# Supplementary material for: Molecular Identification and Characterization of Five Ganoderma Species from the Lower Volta River Basin of Ghana Based on Nuclear Ribosomal DNA (nrDNA) Sequences
Source: MDPI journal article supplement (doi:10.3390/jof10010006), 2023-12-21
Supplement: s1 [file s1]

Supplementary Data

Table S1A: ITS2 sequence matching results of isolates Ganoderma LVRB-1, Ganoderma LVRB-2, Ganoderma LVRB-14, Ganoderma LVRB-16 and Ganoderma LVRB-17 from the Lower Volta River Basin of Ghana

| Species ID        | DNA sequence                                                                                                                                                                                                                                                                                                                                                                                                            | Sequence similarity (%)<br>showing species of top<br>matching candidate   |
|-------------------|-------------------------------------------------------------------------------------------------------------------------------------------------------------------------------------------------------------------------------------------------------------------------------------------------------------------------------------------------------------------------------------------------------------------------|---------------------------------------------------------------------------|
| Ganoderma LVRB-1  | GCATCGATGAAGAACGCAGCGAAATGCGATAAGTAATGTGAATTGCAGAATTCAGTGAATCATCGAATCTTTGAACGCACCT<br>TGCGCTCCTTGGTATTCCGAGGAGCATGCCTGTTTGAGTGTCATGAAATCTTCAACTTGCAACCTCTTTGCGGAGTTTGTAGGC<br>TTGGACTTGGAGGGCTTGTGCGCCTTTAACGGTCGGCTCCTCTTAAATGCATTAGCTTGATTCTTGCRGATCGGCTGTGCGGTG<br>TGATAAAATGTCTACGCCGTGACCGTGAAGCGTTTGGATGAGCTTCcAACCGTCTTGsTTCAAAGACAACCTTTtATGACCTCTG<br>ACCTCAAATCAGGTAGGACTACCCGCTGAACTTAAGCATATCAATAAGCGGAGGA  | <i>Ganoderma<br/>enigmaticum</i> voucher<br>Ghana1a/938398<br><br>99.49%  |
| Ganoderma LVRB-2  | GCATCGATGAAGAACGCAGCGAAATGCGATAAGTAATGTGAATTGCAGAATTCAGTGAATCATCGAATCTTTGAACGCACCT<br>TGCGCTCCTTGGTATTCCGAGGAGCATGCCTGTTTGAGTGTCATGAAATCTTCAACCTGCAAGCTTTTAATCGGTTTGTAGGCT<br>TGGATTTGGAGGCTATTGTGCGCCTTTATCGGTCGGCTCCTCTTAAATGTATTAGCTTGTTTCCTTGCGGATCGGCTTGTGCGGT<br>GTGATAATGTCTACGCCGCGACCGTGAAGCGTTTGGGCAAGCTTCTAACCGTCTCAGTTTAGAGACAACCTTATGACCTCTGA<br>CCTCAAATCAGGTAGGACTACCCGCTGAACTTAAGCATATCAATAAGCGGAGGA    | <i>Ganoderma<br/>mbrekobenum</i> voucher<br>UMN7-4 GHA<br><br>100.00%     |
| Ganoderma LVRB-14 | GCATCGATGAAGAACGCAGCGAAATGCGATAAGTAATGTGAATTGCAGAATTCAGTGAATCATCGAATCTTTGAACGCACCT<br>TGCGCTCCTTGGTATTCCGAGGAGCATGCCTGTTTGAGTGTCATGAAATCTTCAACTTGCAACCTCTTTGCGGAGTTTGTAGGC<br>TTGGACTTGGAGGGCTTGTGCGCCWTTAACGGTCGGCTCCTCTTAAATGCATTAGCTTGATTCTTGCGGATCGGCTGTGCGGT<br>GTGATAAAATGTCTACGCCGTGACCGTGAAGCGTTTGGATGAGCTTCCAACCGTCTTGCTTCAAAGACAACCTTTTTATGACCTC<br>TGACCTCAAATCAGGTAGGACTACCCGCTGAACTTAAGCATATCAATAAGCGGAGGA | <i>Ganoderma<br/>enigmaticum</i> voucher<br>Ghana1a/938398<br><br>99.74%  |
| Ganoderma LVRB-16 | GCATCGATGAAGAACGCAGCGAAATGCGATAAGTAATGTGAATTGCAGAATTCAGTGAATCATCGAATCTTTGAACGCACCT<br>TGCGCTCCTTGGTATTCCGAGGAGCATGCCTGTTTGAGTGTCATGAAATCTTCAACTTGCAACCTCTTTGCGGAGTTTGTAGGC<br>TTGGACTTGGAGGGCTTGTGCGCCWTTAACGGTCGGCTCCTCTTAAATGCATTAGCTTGATTCTTGCGGATCGGCTGTGCGGT<br>GTGATAAAATGTCTACGCCGTGACCGTGAAGCGTTTGGATGAGCTTCcAACCGTCTTGCTTcAAaGACaACTTTtATGACCTCTG<br>ACCTCAAATCAGGTAGGACTACCCGCTGAACTTAAGCATATCAATAAGCGGAGGA   | <i>Ganoderma<br/>enigmaticum</i> voucher<br>Ghana1a/938398<br><br>99.74%* |
| Ganoderma LVRB-17 | GCATCGATGAAGAACGCAGCGAAATGCGATAAGTAATGTGAATTGCAGAATTCAGTGAATCATCGAATCTTTGAACGCACCT<br>TGCGCTCCTTGGTATTCCGAGGAGCATGCCTGTTTGAGTGTCATGAAATCTTCAACCTGCAAGCTTTTAATCGGTTTGTAGGCT<br>TGGATTTGGAGGCTATTGTGCGCCTTTATCGGTCGGCTCCTCTTAAATGTATTAGCTTGTTTCCTTGCGGATCGGCTTGTGCGGT<br>GTGATAATGTCTACGCCGCGACCGTGAAGYGTTTGGGCAAGCTTCTAACCGTCTCAGTTTAGAGCAACCTTATGACCTCTGAC<br>CTCAAATCAGGTAGGACTACCCGCTGAACTTAAGCATATCAATAAGCGGAGGA     | <i>Ganoderma<br/>mbrekobenum</i> voucher<br>UMN7-4<br><br>99.48%*         |

**Table S1B:** ITS sequence matching results of isolates of isolate Ganoderma LVRB-2 and Ganoderma LVRB-17 from the Lower Volta River Basin of GhanaITS2 sequence.

| Species ID        | DNA sequence                                                                                                                                                                                                                                                                                                                                                                                                          | Sequence similarity (%)<br>showing species of top<br>matching candidate |
|-------------------|-----------------------------------------------------------------------------------------------------------------------------------------------------------------------------------------------------------------------------------------------------------------------------------------------------------------------------------------------------------------------------------------------------------------------|-------------------------------------------------------------------------|
| Ganoderma LVRB-2  | GTAAAAGTCGTAACAAGGTTTCCGTAGGTGAACCTGCGGAAGGATCATTATCGAGTTTTGACTGGGTTGTAGCTGGCCT<br>TACGAGGCATGTGCACGCCCTGCTCATCCGCTCTACACCTGTGCACTTACTGTGGGTTACAGACGGTGAAGCGGGCTTC<br>TTACGGGGAGCTTGTGAAGCGTGTCTGTGCCTGCGTTTACCACAAACTCTTTAAAGTATTAGAATGTGTATTGCGATGTA<br>ACGCATCTATATACAACCTTTCAGCAACGGATCTTGGCTCTCGCATCGATGAAGAACGCAGCGAAATGCGATAAGTAATG<br>TGAATTGCAGAATTCAGTGAATCATCGAATCTTTGAACGCACCTTGCGCTCCTTGGTATTCCGAGGAGCAT | <i>Ganoderma mbrekobenum</i><br>voucher UMN7-4 GHA<br>99.49%            |
| Ganoderma LVRB-17 | GTAAAAGTCGTAACAAGGTTTCCGTAGGTGAACCTGCGGAAGGATCATTATCGAGTTTTGACTGGGTTGTAGCTGGCCT<br>TCCGAGGCATGTGCACACCCTGCTCATCCACTCTACACCTGTGCACTTACTGTGGGTTCCAGACGTTGTGAAGCGGGCT<br>CTTTACGGAGCTTGTAAAGCGGCGTGCCTGTGCCTGCGTTTATCACAAACTCTATAAAGTATTAGAATGTGTATTGCGAT<br>GTAACGCATCTATATACAACCTTTCAGCAACGGCTCTTGGCTCTCGCATCGATGAAGAACGCAGCGAAATGCGATAAGTA<br>ATGTGAATTGCAGAATTCAGTGAATCATCGAATCTTTGAACGCACCTTGCGCTCCTTGGTATTCCGAGGAG | <i>Ganoderma resinaceum</i><br>isolate F-2<br>99.48%                    |

**Table S1C:** nLSU nucleotide sequence matching results of isolates Ganoderma LVRB-1, Ganoderma LVRB-2, Ganoderma LVRB-14, Ganoderma LVRB-16 and Ganoderma LVRB-17 from the Lower Volta River Basin of Ghana

| Species ID           | DNA sequence                                                                                                                                                                                                                                                                                                                                                                                                                                                                                                                                                                                                                                                                                                                                                                                                                                                                                                                                                                                                                                                                                                                       | Sequence similarity (%)<br>showing species of top<br>matching candidate |
|----------------------|------------------------------------------------------------------------------------------------------------------------------------------------------------------------------------------------------------------------------------------------------------------------------------------------------------------------------------------------------------------------------------------------------------------------------------------------------------------------------------------------------------------------------------------------------------------------------------------------------------------------------------------------------------------------------------------------------------------------------------------------------------------------------------------------------------------------------------------------------------------------------------------------------------------------------------------------------------------------------------------------------------------------------------------------------------------------------------------------------------------------------------|-------------------------------------------------------------------------|
| Ganoderma<br>LVRB-1  | GAGCGGTCCAATCAAGCGACGGCTCGTTCCTTACATATTTAAAGTTTGAGAATAGGTAAAGGTTGTTTCAACCCCAAGGCC<br>TCTAATCATTGCTTTACACATAAATCTGATAATGAGTTTCTGCTATCCTGAGGGAACTTCGGCAGGAACCAGCTACTA<br>GATGGTTCGATTAGTCTTTCGCCCCATACCCAAATTTGACGATCGATTTGCACGTCAGAATCGCTACGAGCCTCCACCAG<br>AGTTTCCTCTGGCTTCACCTATTACAGGCATAGTTCACCATCTTTCGGGTCCCAACATACATGCTCTACCGCGGATCCGTC<br>AGAGAACGTCAGGTCCGGGCGTCGATGCCCCCAGACAGGGGTCTCAACTTTCACCTTCATTACGCGCTCGGGTTTCC<br>ACCCAAACACTCGCAGGTATGTTAGACTCCTTGGTCCGTGTTTCAAGACGGGTCGTTTAAAGCCATTATGCCAGCATCCTA<br>AGCGCGAAAGTGGGATAAACCCTGCCTTACGGCGCGCTGCGTTCCTCGATCCCAACCGCCGTATGCGACCAGAGTCTAT<br>AACACACCATAAGGTGCCACATTACTCCAGCCCTTTCCGACGGTCAAAATCGATGCTGACCCGTCAATCCGGAAAGTGC<br>ACCAAGCAAAAAAGCAAGGCTGAGTTCGGGATGACGCGACTGACTTCAAGCGTTTCCCTTTCAGCAATTTACGTAAGTGT<br>TTAACTCTCTTCCAAAGTGCTTTTCATCTTTCCTCACGGTACTTGTTTCGCTATCGGTCTCTCGCCAATATTTAGCTTTAG<br>ATGGAATTCACCACCCATTTTGAGCTGCATTCCCAAACAACGACTCTTTGAGAGCGCATCACAAAGCACTGGTAGTCC<br>GTGTCAAAGACGGGATTCTCACCTCTATGACGCTCTGTTCCAAGAGACTTATACACGGTCCAGCGCGGAAAGCACTTCT<br>CCAGACTACAACCTCGGACGGCCAAAGACCGCCAGATTTTAAATTTGAGCTTTTCCCGCTTCACTCGCAGTTACTAGGGGA<br>ATC | <i>Ganoderma enigmaticum</i> CBS<br>139792<br><br>99.90%                |
| Ganoderma<br>LVRB-2  | TAAGCATATCAATAAGCGGAGGAAAAGAACTAACAAGGATTCCCCTAGTAACTGCGAGTGAAGCGGGAAAAGCTCAA<br>ATTTAAATCTGGCGGTCTTTGGCCGTCCGAGTTGTAGTCTGGAGAAGTGCTTTCCGCGCTGGACCGTGTATAAGTCTCTT<br>GGAACAGAGCGTCATAGAGGGTGAGAATCCCGTCTTTGACACGGACTACCAGTGCTTTGTGATGCGCTCTCAAAGAGTCG<br>AGTTGTTTGGGAATGCAGCTCAAAATGGGTGGTGAATTCATCTAAAGCTAAATATTGGCGAGAGACCGATAGCGAACA<br>AGTACCGTGAGGGAAAGATGAAAAGCACTTTGGAAAGAGAGTTAAACAGTACGTGAAATTGCTGAAAGGGAAACGCTT<br>GAAGTCAGTCGCGTTGTCCGGAACCTCAGCCTTGCTTTGCTTGGTGCACCTTCCGGATGACGGGTCAGCATCGATTTTGAC<br>CGTCGGAAAAGGGCTAGAGTAATGTGGCACCTTCGGGTGTGTTATAGACTCTGGTGCATACGGCGGTTGGGATCGAGG<br>AACGCAGCGCGCCGTAAGGCAGGGGTTCTCCCACTTTCGCGCTTAGGATGCTGGCATAATGGCTTTAAACGACCCGTCT                                                                                                                                                                                                                                                                                                                                                                                                                                                | <i>Ganoderma mbrekobenum</i><br>voucher UMN7-4 GHA<br><br>100.0%        |
| Ganoderma<br>LVRB-14 | GATTCCCCTAGTAACTGCGAGTGAAGCGGGAAAAGCTCAAATTTAAATCTGGCGGTCTTTGGCCGTCCGAGTTGTAGTC<br>TGGAGAAGTGCTTTCCGCGCTGGACCGTGTATAAGTCTCTTGAACAGAGCGTCATAGAGGGTGAGAATCCCGTCTTTGA<br>CACGGACTACCAGTGCTTTGTGATGCGCTCTCAAAGAGTCGAGTTGTTTGGGAATGCAGCTCAAAATGGGTGGTGAATTC<br>CATCTAAAGCTAAATATTGGCGAGAGACCGATAGCGAACAAGTACCGTGAGGGAAAAGATGAAAAGCACTTTGGAAAGA<br>GAGTTAAACAGTACGTGAAATTGCTGAAAAGGGAACGCTTGAAGTCAGTCGCGTCCGGAACCTCAGCCTTGCTTTTTT<br>GCTTGGTGCACCTTCCGGATTGACGGGTCAAGCATGATTTTGACCGTCGGAAAAGGGCTGGAGTAATGTGGCACCTTATG<br>GTGTGTTATAGACTCTGGTGCATACGGCGGTTGGGATCGAGGAACGACGCGCCGTAAGGCAGGGGTTTATCCCACTT<br>TCGCGCTTAGGATGCTGGCATAATGGCTTTAAACGACCCGTCTTGAAACACGGACCAAGGAGTCAACATACCTGCGAGT<br>GTTTGGGTGGAACCCGAGCGCGTAATGAAAGTGAAAGTTGAGACCCCTGTCGTGGGGGGCATCGACGCCCCGACCTG<br>ACGTTCTCTGACGGATCCGCGGTAGAGCATGTATGTTGGGA                                                                                                                                                                                                                                                                                                                  | <i>Ganoderma enigmaticum</i><br>voucher Ghana1a/938398<br><br>100.00%   |

|                      |                                                                                                                                                                                                                                                                                                                                                                                                                                                                                                                                                                                                                                                                                                                                                                                                                                                        |                                                                          |
|----------------------|--------------------------------------------------------------------------------------------------------------------------------------------------------------------------------------------------------------------------------------------------------------------------------------------------------------------------------------------------------------------------------------------------------------------------------------------------------------------------------------------------------------------------------------------------------------------------------------------------------------------------------------------------------------------------------------------------------------------------------------------------------------------------------------------------------------------------------------------------------|--------------------------------------------------------------------------|
| Ganoderma<br>LVRB-16 | <p>GATTCCCCTAGTAACTGCGAGTGAAGCGGGAAAAGCTCAAATTTAAAATCTGGCGGTCTTTGGCCGTCCGAGTTGTAGTC<br/> TGGAGAAGTGCTTTCCGCGCTGGACCGTGTATAAGTCTCTTGGAACAGAGCGTCATAGAGGGTGAGAATCCCGTCTTTGA<br/> CACGGACTACCAAGTGCTTTGTGATGCGCTCTCAAAGAGTCGAGTTGTTTGGGAATGCAGCTCAAAATGGGTGGTGAATTC<br/> CATCTAAAGCTAAATATTGGCGAGAGACCGATAGCGAACAAGTACCGTGAGGGAAAGATGAAAAGCACTTTGGAAAGA<br/> GAGTTAAACAGTACGTGAAATTGCTGAAAGGGAAACGCTTGAAGTCAGTCGCGTCGTCCGGAACCTCAGCCTTGCTTTTTT<br/> GCTTGGTGCACCTTTCCGGATTGACGGGTGAGCATCGATTTTGACCGTCGGAAAAGGGCTGGAGTAATGTGGCACCTTATG<br/> GTGTGTTATAGACTCTGGTCGCATACGGCGGTTGGGATCGAGGAACGCAGCGCGCCGTAAGGCAGGGGTTTATCCCACTT<br/> TCGCGCTTAGGATGCTGGCATAATGGCTTTAAACGACCCGTCTTGAAACACGGACCAAGGAGTCTAACATACCTGCGAGT<br/> GTTTGGGTGGAAAACCCGAGCGCGTAATGAAAGTGAAAGTTGAGACCCCTGTCGTGGGGGGCATCGACGCCCGGACCTG<br/> ACGTTCTCTGACGGATCCGCGGTAGAGCATGTATGTTGGGA</p> | <p><i>Ganoderma enigmaticum</i> CBS<br/>139792<br/><br/>99.71%</p>       |
| Ganoderma<br>LVRB-17 | <p>GATTCCCCTAGTAACTGCGAGTGAAGCGGGAAAAGCTCAAATTTAAAATCTGGCGGTCTTTGGCCGTCCGAGTTGTAGTC<br/> TGGAGAAGTGCTTTCCGCGCTGGACCGTGTATAAGTCTCTTGGAACAGAGCGTCATAGAGGGTGAGAATCCCGTCTTTGA<br/> CACGGACTACCAAGTGCTTTGTGATGCGCTCTCAAAGAGTCGAGTTGTTTGGGAATGCAGCTCAAAATGGGTGGTGAATTC<br/> CATCTAAAGCTAAATATTGGCGAGAGACCGATAGCGAACAAGTACCGTGAGGGAAAGATGAAAAGCACTTTGGAAAGA<br/> GAGTTAAACAGTACGTGAAATTGCTGAAAGGGAAACGCTTGAAGTCAGTCGCGTCGTCCGGAACCTCAGCCTTGCTTTTTT<br/> GCTTGGTGCACCTTTCCGGATTGACGGGTGAGCATCGATTTTGACCGTCGGAAAAGGGCTGGAGTAATGTGGCACCTTATG<br/> GTGTGTTATAGACTCTGGTCGCATACGGCGGTTGGGATCGAGGAACGCAGCGCGCCGTAAGGCAGGGGTTTATCCCACTT<br/> TCGCGCTTAGGATGCTGGCATAATGGCTTTAAACGACCCGTCTTGAAACACGGACCAAGGAGTCTAACATACCTGCGAGT<br/> GTTTGGGTGGAAAACCCGAGCGCGTAATGAAAGTGAAAGTTGAGACCCCTGTCGTGGGGGGCATCGACGCCCGGACCTG<br/> ACGTTCTCTGACGGATCCGCGGTAGAGCATGTATGTTGGGA</p> | <p><i>Ganoderma resinaceum</i><br/>voucher LGAM 566<br/><br/>100.00%</p> |
